# Supplementary material for: Verordnungshäufigkeit von physikalischer Therapie bei entzündlich rheumatischen Erkrankungen
Source: Springer Nature journal article supplement (doi:10.1007/s00393-022-01180-x), 2022-03-22

## Zusatzmaterial

| Medikamentengruppe | Jahr       | ATC-Codes                                                                                                                 |
|--------------------|------------|---------------------------------------------------------------------------------------------------------------------------|
| Glukokortikoide    | 2006, 2020 | H02AB01, H02AB02, H02AB03, H02AB04, H02AB05, H02AB06, H02AB07, H02ABX                                                     |
| NSAR               | 2006, 2020 | M01A                                                                                                                      |
| csDMARDs           | 2006, 2020 | A07EC01, C02KX01, M01C, P01BA01, P01BA02, M01CX02, M01CX01, L04AX03, L04AA13, L04AX01, L01AA01, L04AA01, L04AA06, L04AA05 |
| bDMARDs            | 2006       | L04AA11, L04AA12, L04AA17, L04AA14                                                                                        |
| bDMARDs            | 2020       | L04AB, L04AA24, L04AC03, L04AC07, L01CX02, L04AA26, L04AC10, L04AC13, L04AC15, L04AC08, L04AC05                           |
| tsDMARDs           | 2020       | L04AA32, L04AA29, L04AA37                                                                                                 |

|       | N      | Physikalische Therapie (alle) | Krankengymnastik | Massagen | Manuelle Therapie | Thermotherapie | Elektrotherapie | Ergotherapie |
|-------|--------|-------------------------------|------------------|----------|-------------------|----------------|-----------------|--------------|
| RA    |        |                               |                  |          |                   |                |                 |              |
| 2005  | 78834  | 46                            | 35               | 13       | 7                 | 17             | 3.4             | 4            |
| 2006  | 88679  | 45                            | 35               | 12       | 8                 | 15             | 3.0             | 6            |
| 2007  | 91468  | 46                            | 35               | 11       | 8                 | 15             | 2.8             | 7            |
| 2008  | 95496  | 46                            | 35               | 10       | 9                 | 15             | 2.9             | 7            |
| 2009  | 99125  | 45                            | 35               | 9        | 10                | 14             | 2.7             | 8            |
| 2010  | 104312 | 46                            | 35               | 9        | 11                | 14             | 2.6             | 8            |
| 2011  | 106293 | 47                            | 36               | 8        | 11                | 14             | 2.6             | 9            |
| 2012  | 110175 | 47                            | 36               | 7        | 12                | 14             | 2.4             | 9            |
| 2013  | 115140 | 47                            | 36               | 7        | 13                | 13             | 2.4             | 10           |
| 2014  | 119262 | 48                            | 37               | 6        | 14                | 13             | 2.3             | 10           |
| 2015  | 122412 | 48                            | 37               | 6        | 15                | 13             | 2.2             | 10           |
| 2016  | 141468 | 43                            | 33               | 4        | 14                | 11             | 2.0             | 9            |
| 2017  | 143793 | 48                            | 38               | 4        | 15                | 11             | 2.4             | 10           |
| 2018  | 145128 | 48                            | 39               | 4        | 15                | 11             | 2.4             | 11           |
| 2019  | 146404 | 49                            | 39               | 3        | 15                | 11             | 2.3             | 11           |
| 2020  | 144921 | 46                            | 37               | 3        | 14                | 10             | 2.0             | 11           |
|       |        | Physikalische Therapie (alle) | Krankengymnastik | Massagen | Manuelle Therapie | Thermotherapie | Elektrotherapie | Ergotherapie |
| axSpA |        |                               |                  |          |                   |                |                 |              |
| 2005  | 15448  | 50                            | 38               | 16       | 8                 | 19             | 3               | 3            |
| 2006  | 17521  | 48                            | 37               | 14       | 9                 | 17             | 3               | 3            |
| 2007  | 17961  | 48                            | 37               | 13       | 9                 | 17             | 2               | 4            |
| 2008  | 18754  | 48                            | 36               | 12       | 10                | 16             | 2               | 5            |
| 2009  | 19321  | 47                            | 36               | 11       | 11                | 16             | 2               | 5            |
| 2010  | 20418  | 48                            | 36               | 10       | 12                | 16             | 2               | 6            |
| 2011  | 20860  | 49                            | 38               | 9        | 13                | 15             | 2               | 6            |
| 2012  | 21851  | 49                            | 37               | 8        | 14                | 15             | 2               | 6            |
| 2013  | 22948  | 49                            | 37               | 8        | 15                | 15             | 2               | 7            |
| 2014  | 23830  | 51                            | 39               | 7        | 16                | 14             | 2               | 7            |
| 2015  | 24238  | 50                            | 38               | 6        | 16                | 14             | 2               | 7            |

|                                                                                                                        |       |                               |                  |          |                   |                |                 |              |
|------------------------------------------------------------------------------------------------------------------------|-------|-------------------------------|------------------|----------|-------------------|----------------|-----------------|--------------|
| 2016                                                                                                                   | 28064 | 45                            | 35               | 5        | 15                | 12             | 2               | 6            |
| 2017                                                                                                                   | 28606 | 50                            | 39               | 4        | 16                | 13             | 2               | 7            |
| 2018                                                                                                                   | 29040 | 51                            | 40               | 4        | 16                | 13             | 2               | 7            |
| 2019                                                                                                                   | 29499 | 51                            | 40               | 3        | 17                | 12             | 2               | 8            |
| 2020                                                                                                                   | 29249 | 49                            | 38               | 3        | 16                | 11             | 2               | 8            |
|                                                                                                                        |       | Physikalische Therapie (alle) | Krankengymnastik | Massagen | Manuelle Therapie | Thermotherapie | Elektrotherapie | Ergotherapie |
| PsA                                                                                                                    |       |                               |                  |          |                   |                |                 |              |
| 2005                                                                                                                   | 2998  | 43                            | 33               | 12       | 8                 | 16             | 2,9             | 3,6          |
| 2006                                                                                                                   | 3945  | 44                            | 34               | 11       | 8                 | 15             | 3,3             | 4,1          |
| 2007                                                                                                                   | 4587  | 45                            | 34               | 11       | 10                | 15             | 3,1             | 4,9          |
| 2008                                                                                                                   | 5416  | 44                            | 34               | 10       | 9                 | 15             | 2,8             | 5,7          |
| 2009                                                                                                                   | 6113  | 45                            | 34               | 10       | 11                | 15             | 2,5             | 6,6          |
| 2010                                                                                                                   | 6990  | 45                            | 34               | 9        | 12                | 15             | 2,8             | 7,5          |
| 2011                                                                                                                   | 8626  | 46                            | 34               | 8        | 13                | 15             | 2,8             | 7,6          |
| 2012                                                                                                                   | 9923  | 45                            | 33               | 7        | 14                | 14             | 2,8             | 7,9          |
| 2013                                                                                                                   | 11110 | 46                            | 34               | 6        | 15                | 13             | 2,3             | 8,9          |
| 2014                                                                                                                   | 12128 | 47                            | 35               | 6        | 16                | 14             | 2,2             | 8,4          |
| 2015                                                                                                                   | 12857 | 48                            | 35               | 6        | 16                | 14             | 2,2             | 8,5          |
| 2016                                                                                                                   | 15679 | 43                            | 32               | 4        | 15                | 12             | 2               | 8,6          |
| 2017                                                                                                                   | 16971 | 49                            | 37               | 4        | 17                | 13             | 2,6             | 9            |
| 2018                                                                                                                   | 17930 | 49                            | 38               | 4        | 17                | 13             | 2,3             | 10,1         |
| 2019                                                                                                                   | 19090 | 49                            | 38               | 3        | 17                | 13             | 2,2             | 10,4         |
| 2020                                                                                                                   | 19760 | 46                            | 36               | 2        | 16                | 11             | 2               | 10,6         |
|                                                                                                                        |       | Physikalische Therapie (alle) | Krankengymnastik | Massagen | Manuelle Therapie | Thermotherapie | Elektrotherapie | Ergotherapie |
| SLE                                                                                                                    |       |                               |                  |          |                   |                |                 |              |
| 2005                                                                                                                   | 2569  | 42                            | 29               | 14       | 8                 | 16             | 4               | 4            |
| 2006                                                                                                                   | 2863  | 42                            | 30               | 12       | 8                 | 14             | 3               | 5            |
| 2007                                                                                                                   | 2951  | 42                            | 31               | 12       | 9                 | 15             | 3               | 6            |
| 2008                                                                                                                   | 3209  | 42                            | 31               | 10       | 10                | 13             | 3               | 7            |
| 2009                                                                                                                   | 3345  | 42                            | 30               | 9        | 11                | 14             | 3               | 7            |
| 2010                                                                                                                   | 3528  | 44                            | 32               | 9        | 12                | 14             | 3               | 8            |
| 2011                                                                                                                   | 3620  | 44                            | 32               | 9        | 13                | 15             | 3               | 9            |
| 2012                                                                                                                   | 3855  | 43                            | 31               | 7        | 13                | 13             | 2               | 9            |
| 2013                                                                                                                   | 4109  | 43                            | 32               | 7        | 13                | 13             | 3               | 9            |
| 2014                                                                                                                   | 4247  | 45                            | 33               | 6        | 14                | 13             | 2               | 10           |
| 2015                                                                                                                   | 4444  | 44                            | 33               | 5        | 14                | 11             | 2               | 10           |
| 2016                                                                                                                   | 5055  | 40                            | 29               | 4        | 14                | 10             | 2               | 8            |
| 2017                                                                                                                   | 5329  | 45                            | 34               | 4        | 15                | 11             | 3               | 10           |
| 2018                                                                                                                   | 5490  | 45                            | 34               | 3        | 15                | 11             | 3               | 10           |
| 2019                                                                                                                   | 5483  | 45                            | 34               | 3        | 15                | 10             | 2               | 11           |
| 2020                                                                                                                   | 5458  | 43                            | 33               | 3        | 14                | 9              | 2               | 9            |
| RA rheumatoide Arthritis, axSpA axiale Spondyloarthritis, PsA Psoriasisarthritis, SLE systemischer Lupus erythematodes |       |                               |                  |          |                   |                |                 |              |

| Tabelle S3 Anzahl der verschriebenen physikalische Therapie Termine pro Patient:in |      |                           |        |                      |
|------------------------------------------------------------------------------------|------|---------------------------|--------|----------------------|
| Fachrichtung                                                                       | Jahr | Mittelwert (Standardabw.) | Median | Quartil 1; Quartil 3 |
| Alle                                                                               | 2010 | 25 (33)                   | 14     | 6; 30                |
| Allgemeinmedizin                                                                   | 2010 | 21 (30)                   | 12     | 6; 24                |
| Rheumatologie                                                                      | 2010 | 21 (26)                   | 12     | 6; 24                |
| Orthopädie                                                                         | 2010 | 17 (19)                   | 12     | 6; 20                |
| Andere Fachrichtung                                                                | 2010 | 14 (25)                   | 6      | 2; 14                |
| Alle                                                                               | 2020 | 25 (35)                   | 14     | 6; 32                |
| Allgemeinmedizin                                                                   | 2020 | 20 (33)                   | 12     | 6; 24                |
| Rheumatologie                                                                      | 2020 | 25 (29)                   | 12     | 6; 30                |
| Orthopädie                                                                         | 2020 | 17 (20)                   | 12     | 6; 20                |
| Andere Fachrichtung                                                                | 2020 | 16 (28)                   | 6      | 10; 18               |

**Abbildung S1** Verordnungen von Physikalischer Therapie in den Jahren 2005 – 2020, standardisiert nach Alter und Geschlecht auf die Population der gesetzlich Krankenversicherten in Deutschland im Jahr 2020.

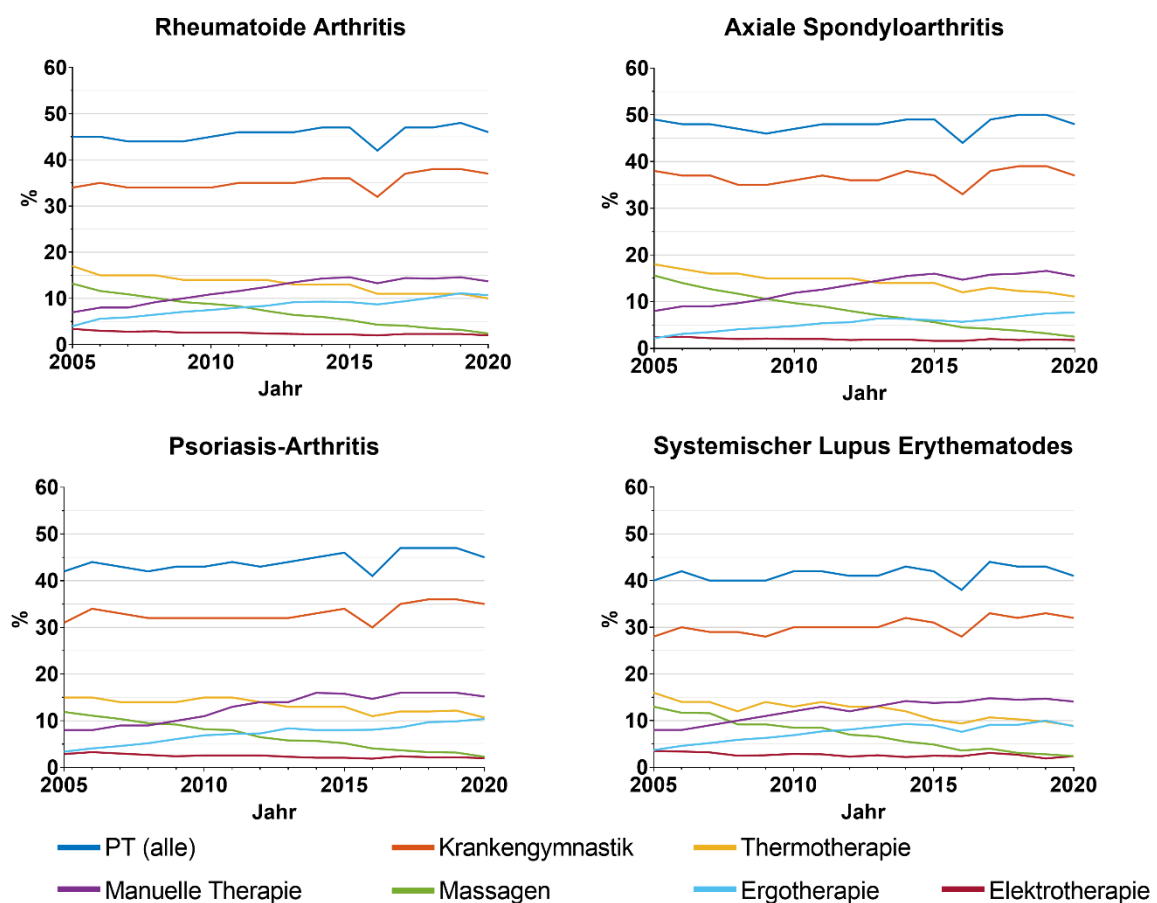

Standardisiert auf die Population der gesetzlich Krankenversicherten in Deutschland 2020

**Abbildung S2** Verordnungen von Physikalischer Therapie in den Jahren 2005 – 2020, standardisiert nach Alter und Geschlecht auf die jeweilige Population Barmer-Versicherter mit der entsprechenden Diagnose in 2020.

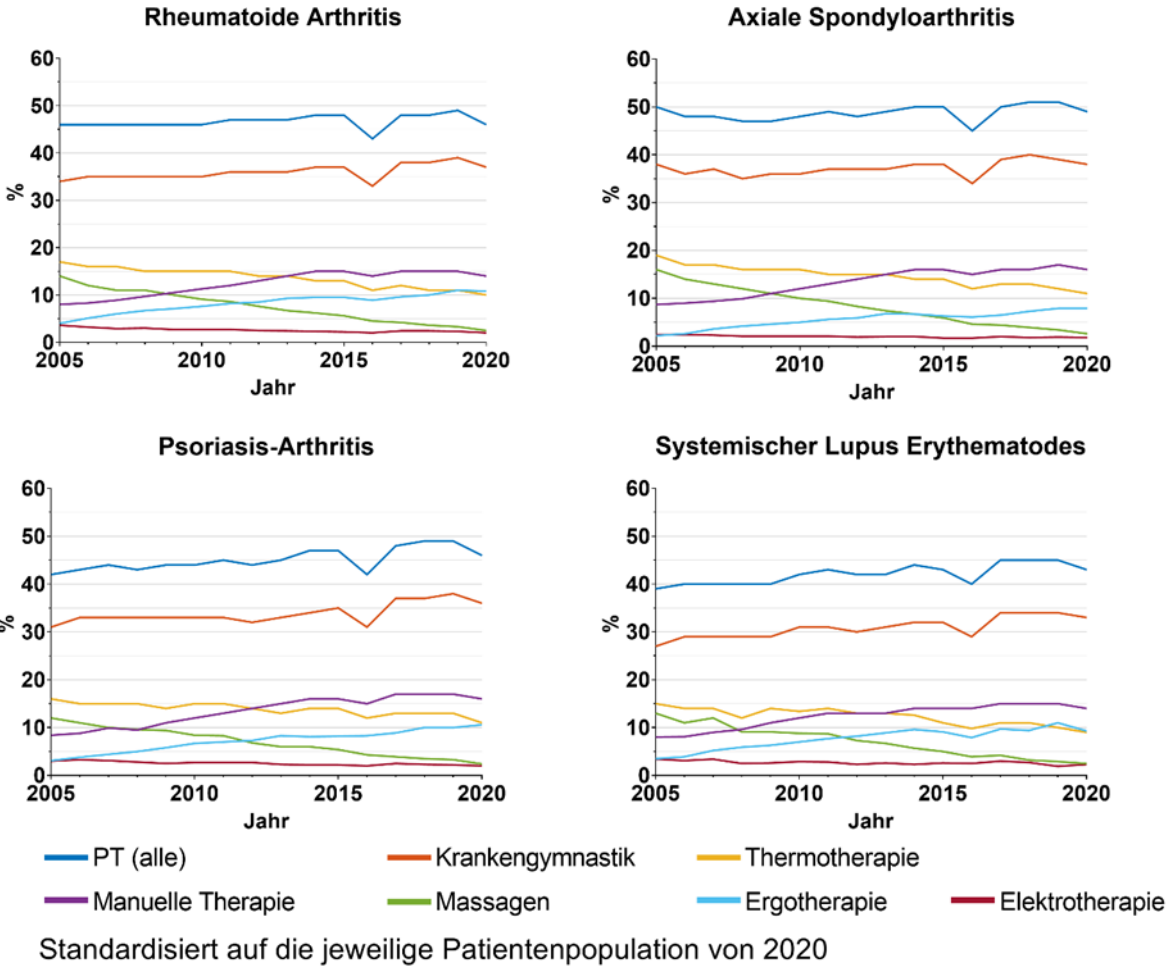

Supplement: MOESM1 [file 20243344]
